# Supplementary material for: Curative effects of dietary secoisolariciresinol diglucoside on type 2 diabetes: action and mechanism
Source: Research Square preprint supplement (doi:10.21203/rs.3.rs-6819058/v1), 2025-06-19
Supplement: Supplementary file 1 [file df98aafa0a9bc9936ec8a7ec.docx]

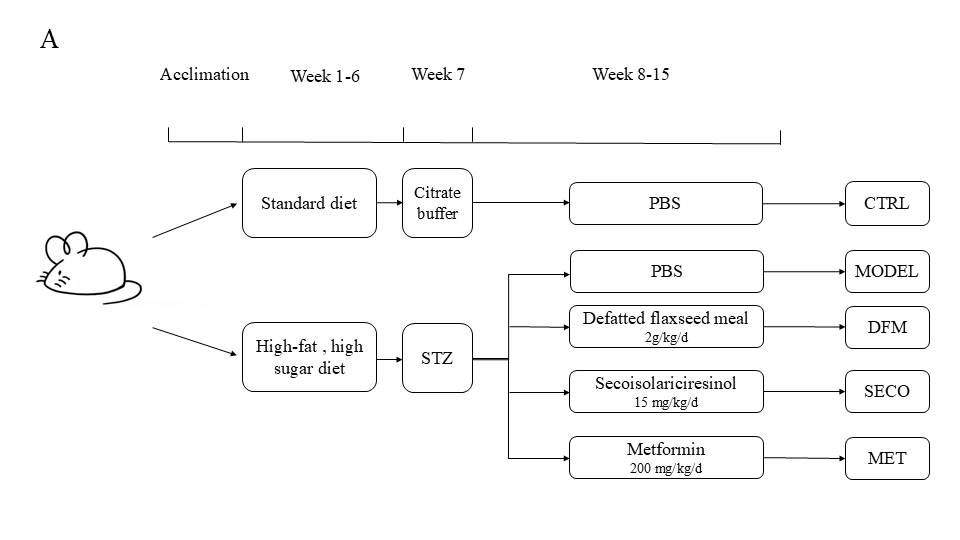


**Figure S1.** Experimental flow chart


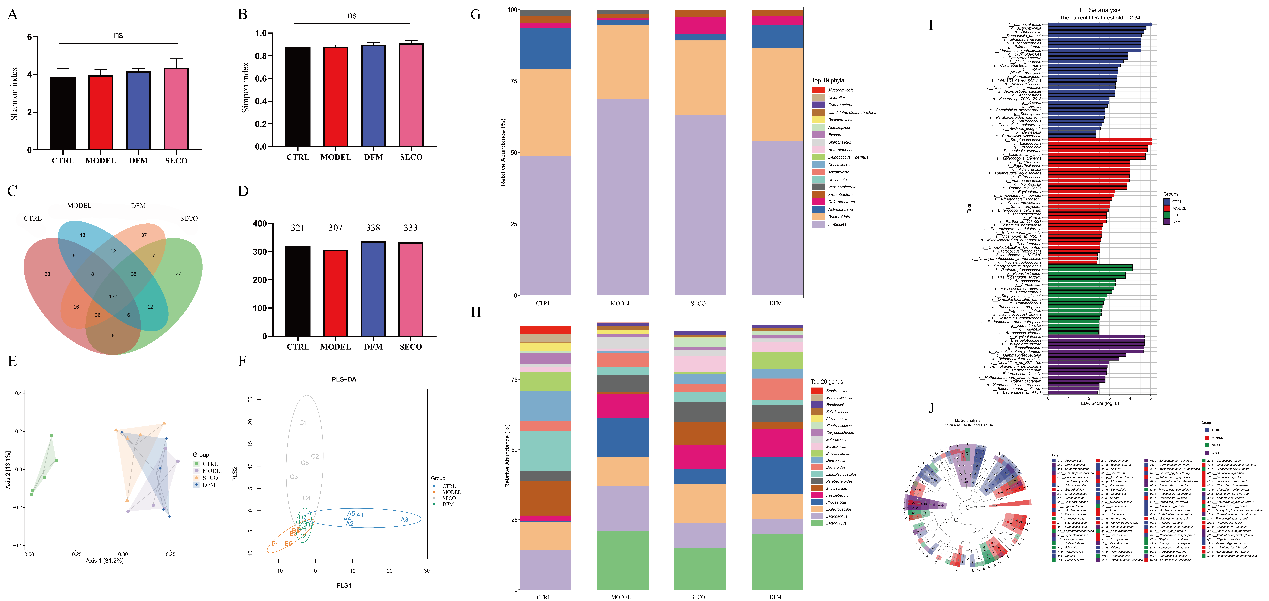


**Figure S2. Effects of DFM and SECO on intestinal microbial species diversity in T2DM mice.** (A) the Shannon index. (B) Simpon index. (C) Venn diagram of species in each group. (D) Total number of species in each group. (E) PCoA analysis. (F) PLS-DA analysis. (G)phylum level. (H)genus level. (I) LDA discriminant histogram. (J) LEfSe multi-level classification tree diagram. n=5

**
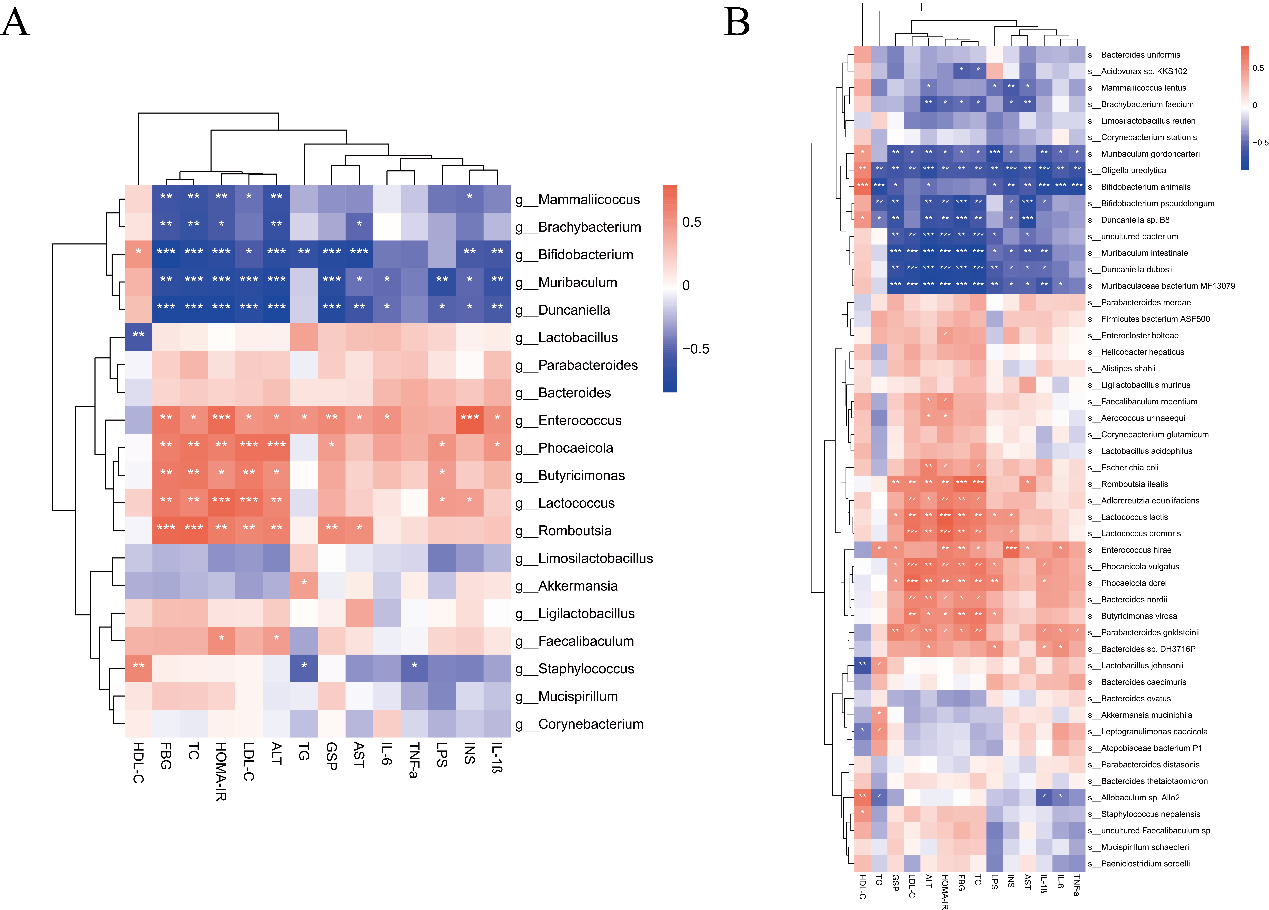
**

**Figure S3. DFM and SECO treatment reversed the imbalance of intestinal flora abundance of mice caused by hyperglycemia and insulin resistance.** (A)Sperman correlation analysis between the top 20 microbial genera in the intestinal flora and related parameters of hyperglycemic and insulin-resistant mice. (B) Sperman correlation analysis between the top 50 microbial species in the intestinal flora and related parameters of hyperglycemic and insulin-resistant mice. * P<0.05, ** P< 0.01, n=5.


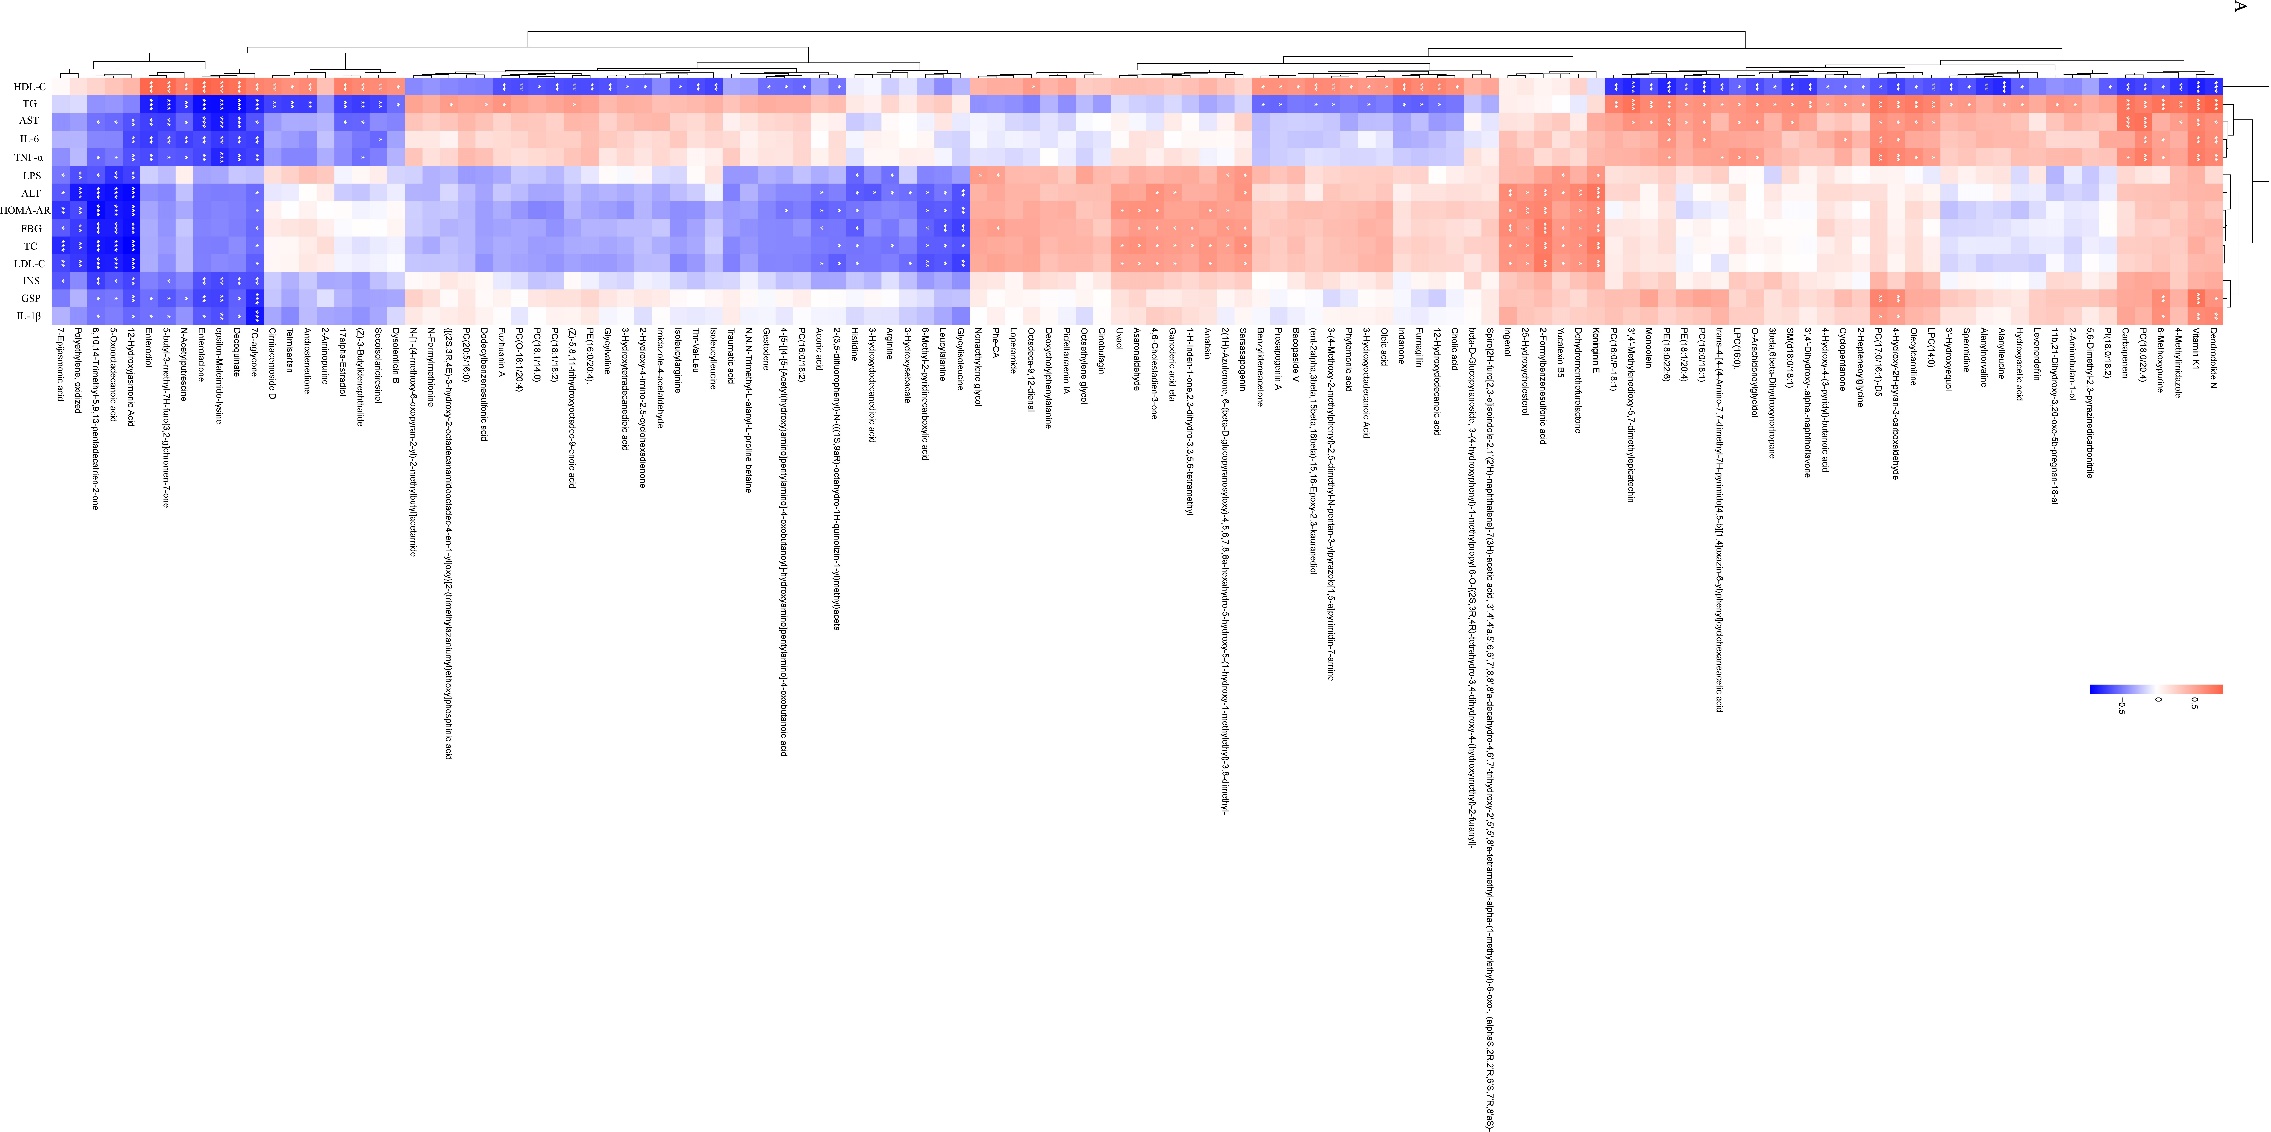


**Figure S4. Spearman correlation analysis between the differential metabolites and related parameters of hyperglycemic and insulin-resistant mice.**
